# Supplementary material for: Temporal Dynamics of Serum Perforin and Granzyme during the Acute Phase of SARS-CoV-2 Infection
Source: MDPI journal article supplement (doi:10.3390/vaccines11081314), 2023-08-01
Supplement: s1 [file s1]

## Supplementary Materials

**Table S1.** Temporal changes of serum levels of perforin, granzyme A, and granzyme B in the mild group of SARS-CoV-2 patients and healthy control participants.

|                       | Healthy controls<br>(n=20) | Mild group<br>(n=77) | P-value | Time from symptom onset |         |                     |         |                      |         |
|-----------------------|----------------------------|----------------------|---------|-------------------------|---------|---------------------|---------|----------------------|---------|
|                       |                            |                      |         | Early phase<br>(n=28)   | P-value | Mid Phase<br>(n=24) | P-value | Late phase<br>(n=25) | P-value |
| Perforin<br>(ng/mL)   | 5.03<br>±2.78              | 3.39<br>±3.54        | < 0.01  | 2.93 ± 2.51             | <0.001  | 3.17 ± 3.20         | 0.06    | 4.14 ± 3.76          | 0.26    |
| Granzyme A<br>(pg/mL) | 143.42<br>±96.27           | 107.69<br>±81.95     | 0.25    | 105.48 ±<br>92.68       | 0.48    | 93.41 ±<br>90.47    | 0.30    | 124.20 ±<br>112.29   | 0.19    |
| Granzyme B<br>(pg/mL) | 212.98<br>±147.57          | 32.81<br>±41.06      | 0.28    | 25.94 ±<br>20.14        | 0.55    | 39.79 ±<br>24.08    | 0.92    | 35.71 ±<br>21.38     | 0.09    |

Note: Values were presented in mean ± standard deviation. P-values were estimated by the t-test or Mann-Whitney U tests comparing each phase of SARS-CoV-2 infection and severity with the healthy controls after the levels were transformed log 10. Based on days after symptom onset, the period of infection was classified as follows; Early phase, 1 – 5 days; Mid-phase, 6 – 10 days; Late phase, 11 – 18 days. Based on the clinical severity score from World Health Organization, disease severity was classified into the mild groups.

**Table S2.** Temporal changes of serum levels of perforin, granzyme A, and granzyme B in the moderate-severe group of SARS-CoV-2 patients, and healthy control participants.

|                       | Healthy controls<br>(n=20) | Moderate-severe group<br>(n=23) | P-value | Time from symptom onset |         |                    |         |                     |         |
|-----------------------|----------------------------|---------------------------------|---------|-------------------------|---------|--------------------|---------|---------------------|---------|
|                       |                            |                                 |         | Early phase<br>(n=8)    | P-value | Mid Phase<br>(n=7) | P-value | Late phase<br>(n=8) | P-value |
| Perforin<br>(ng/mL)   | 5.03<br>±2.78              | 2.74<br>±2.06                   | 0.05    | 2.49 ± 1.99             | 0.052   | 2.76 ± 2.42        | 0.63    | 2.94 ± 5.29         | 0.37    |
| Granzyme A<br>(pg/mL) | 143.42<br>±96.27           | 106.81<br>±53.10                | 0.03    | 111.81 ±<br>51.10       | 0.04    | 93.72 ±<br>49.11   | 0.02    | 114.92 ±<br>53.96   | 0.053   |
| Granzyme B<br>(pg/mL) | 212.98<br>±147.57          | 20.96<br>±13.40                 | 0.19    | 18.79 ±<br>16.80        | 0.23    | 17.28 ±<br>14.71   | 0.35    | 26.79 ±<br>15.78    | 0.22    |

Note: Values were presented in mean ± standard deviation. P-values were estimated by the t-test or Mann-Whitney U tests comparing each phase of SARS-CoV-2 infection and severity with the healthy controls after the levels were transformed log 10. Based on days after symptom onset, the period of infection was classified as follows; Early phase, 1 – 5 days; Mid-phase, 6 – 10 days; Late phase, 11 – 18 days. Based on the clinical severity score from World Health Organization, disease severity was classified into the moderate-severe groups.
